# Supplementary material for: Natural and cryptic peptides dominate the immunopeptidome of atypical teratoid rhabdoid tumors
Source: HighWire-hosted journal article supplement (doi:10.1136/jitc-2021-003404), 2021-10-01
Supplement: jitc-2021-003404supp003_data_supplement.pdf [file jitc-2021-003404supp003_data_supplement.pdf]

## Supplementary Figure 3A

Synthetic reference peptide

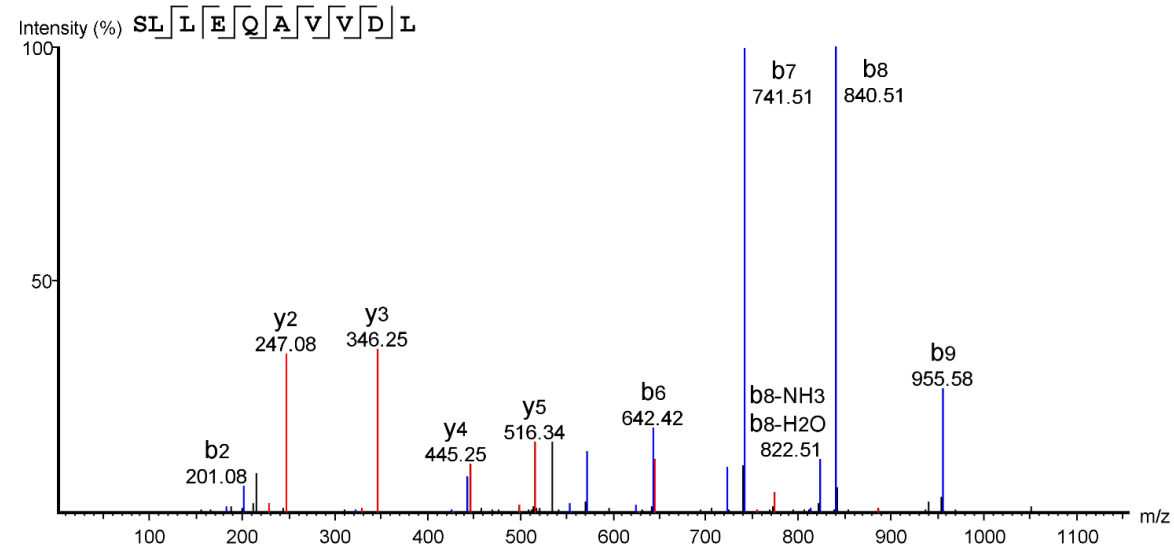

Original peptide

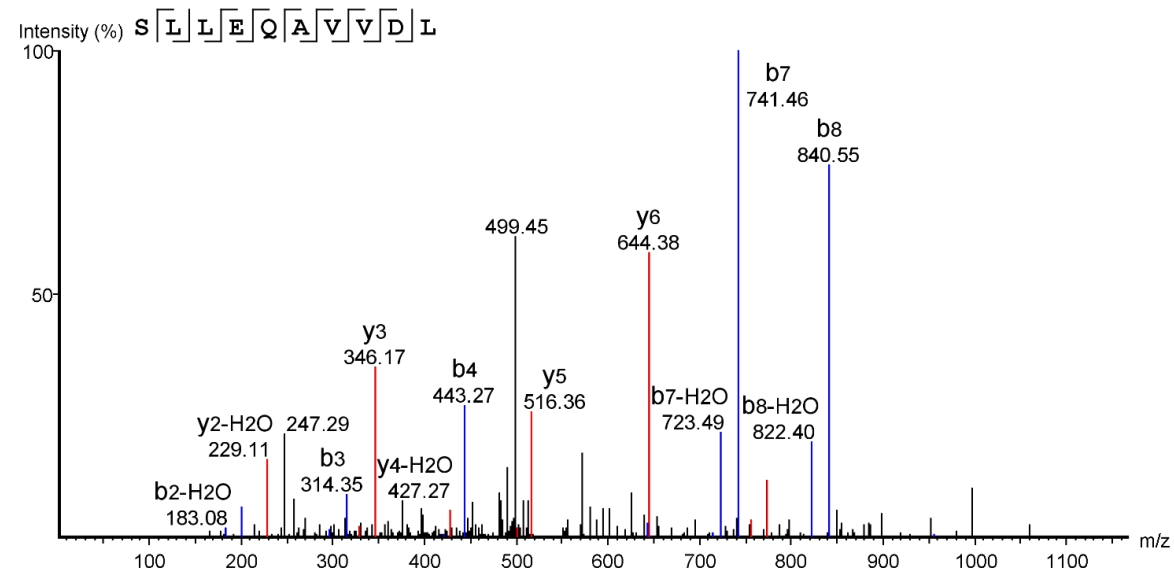

## Supplementary Figure 3B

Synthetic reference peptide

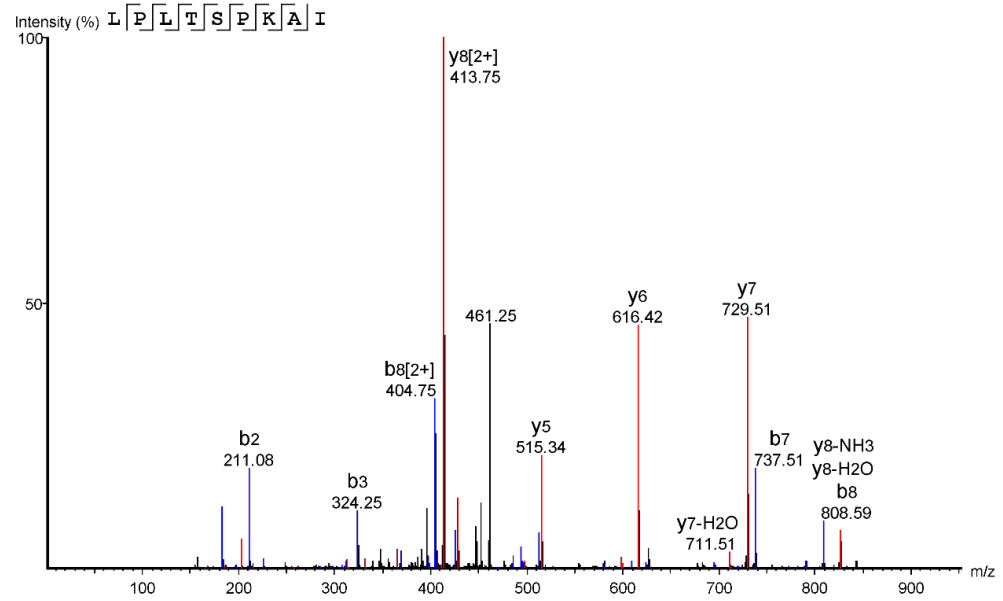

Original peptide

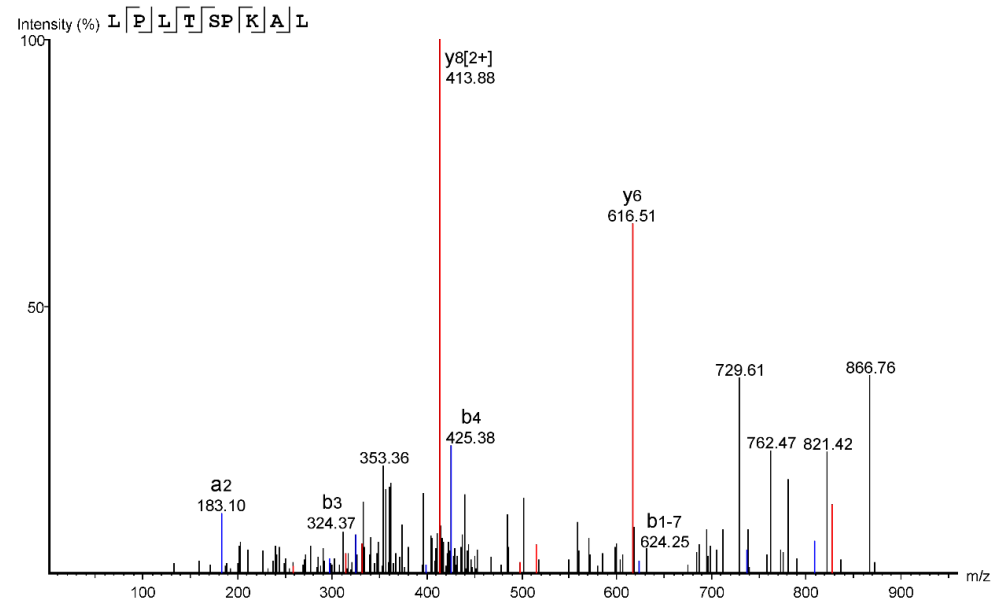

## Supplementary Figure 3C

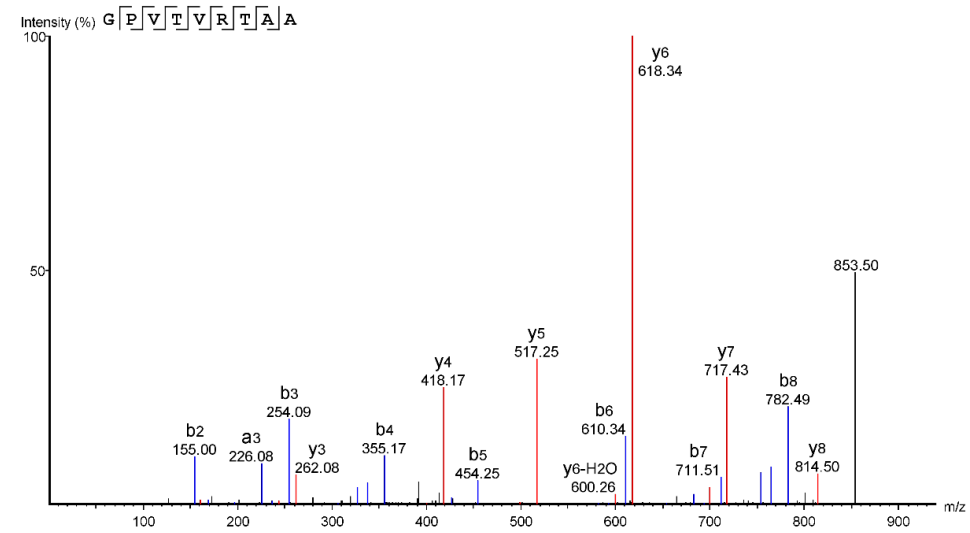

Synthetic reference peptide

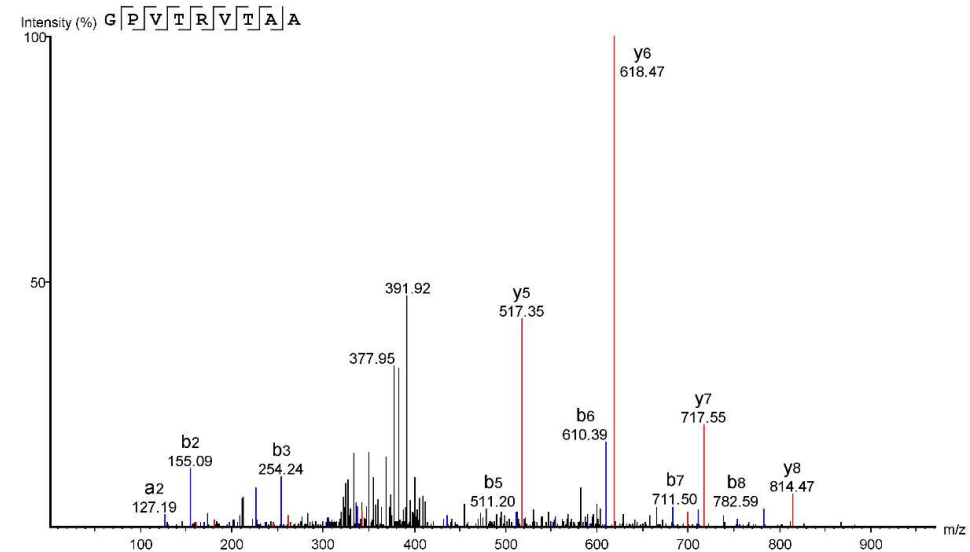

Original peptide

## Supplementary Figure 3D

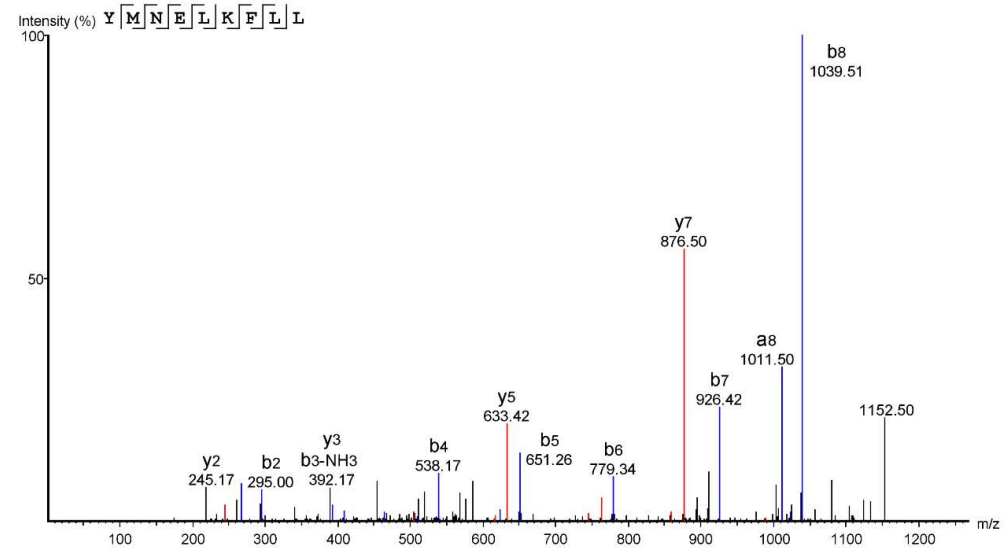

Synthetic reference peptide

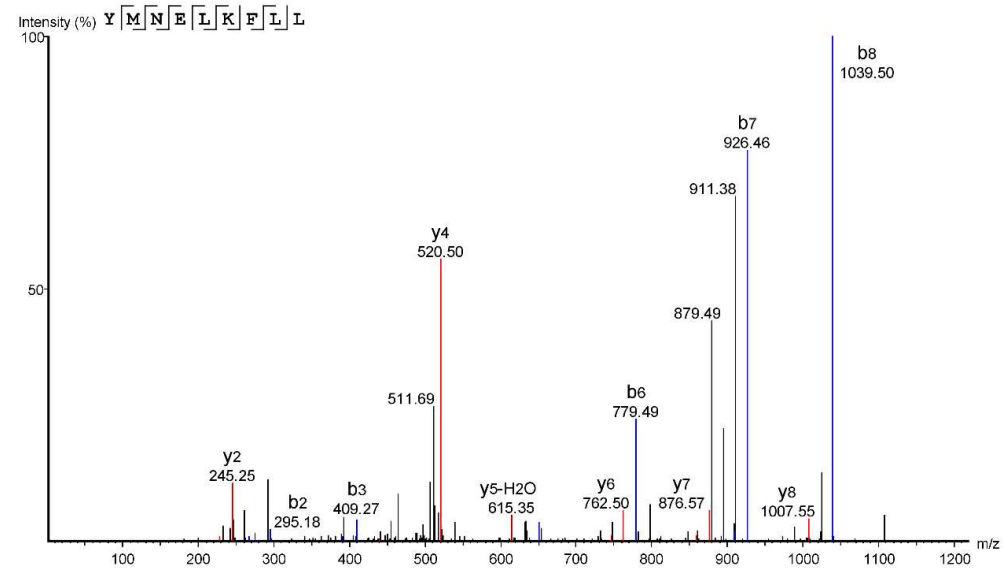

Original peptide

## Supplementary Figure 3E

Synthetic reference peptide

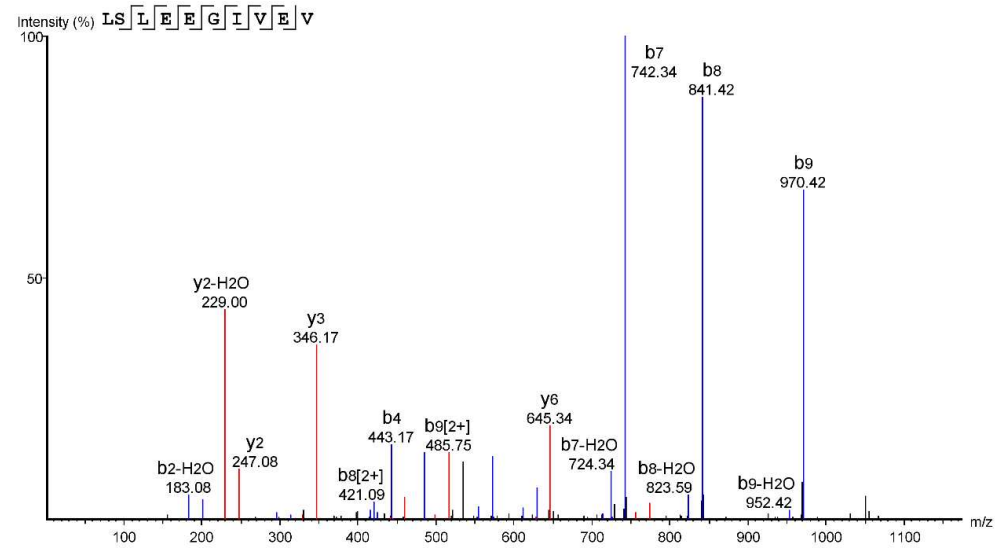

Original peptide

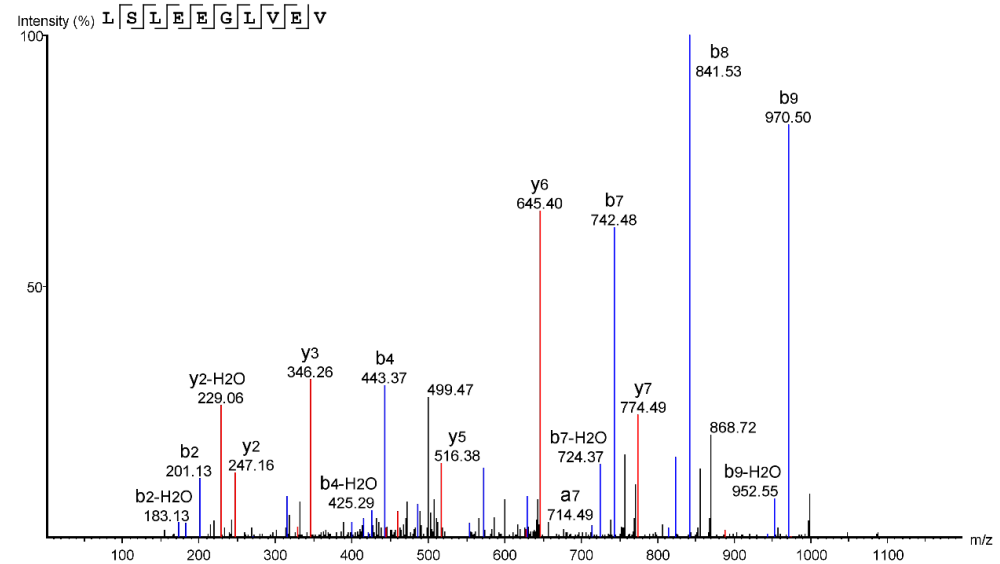

## Supplementary Figure 3F

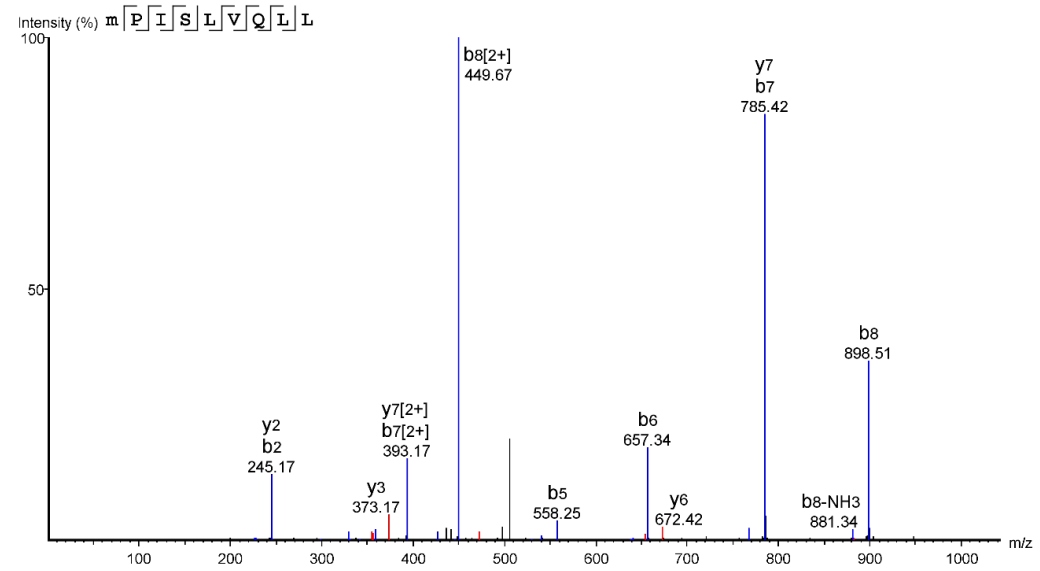

Synthetic reference peptide

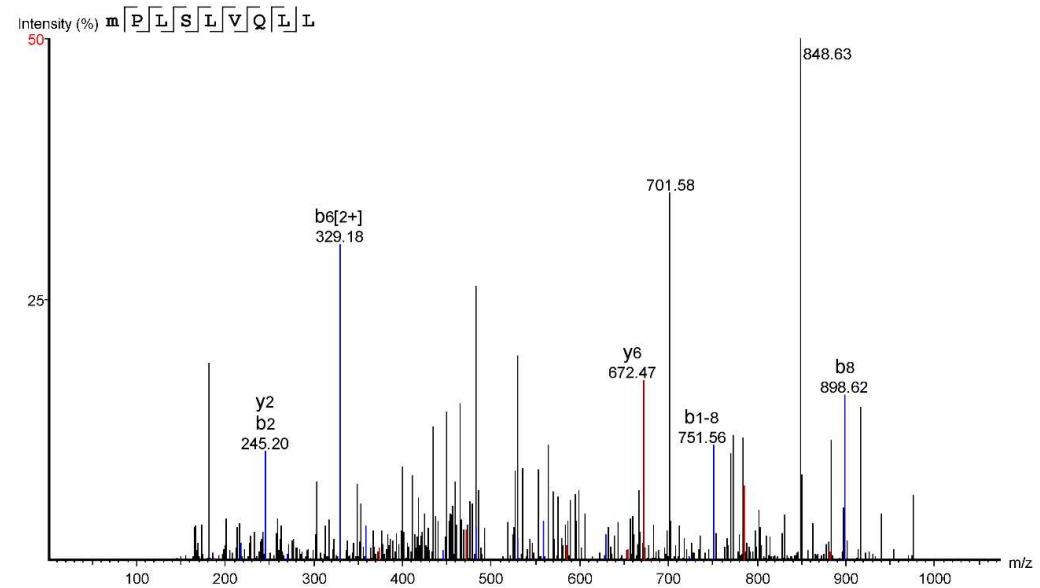

Original peptide

## Supplementary Figure 3

Supplementary Figure 3A-F: Fragment ion spectra of cryptic HLA-I peptides identified from AT/RT samples in comparison to reference spectra generated from the corresponding synthetic peptides. HLA peptides from AT/RT samples were analyzed on an Orbitrap XL applying collisional-induced dissociation (CID) in the ion trap. Reference spectra were analyzed on an Orbitrap Velos Pro applying ion trap CID. On both instruments fragment ion spectra were recorded with the ion trap.
