# Supplementary material for: Natural and cryptic peptides dominate the immunopeptidome of atypical teratoid rhabdoid tumors
Source: HighWire-hosted journal article supplement (doi:10.1136/jitc-2021-003404), 2021-10-01
Supplement: jitc-2021-003404supp009_data_supplement.pdf [file jitc-2021-003404supp009_data_supplement.pdf]

**supplementary Table 5: Results of the DAVID 6.8 database search regarding biological process (BP)**

| <b>Ligandom_MHC_I (n=53)</b>   |  | Term                                                               | Count | %    | PValue      |
|--------------------------------|--|--------------------------------------------------------------------|-------|------|-------------|
| GOTERM_BP_DIRECT               |  | GO:0007218~neuropeptide signaling pathway                          | 3     | 5,70 | #####       |
| GOTERM_BP_DIRECT               |  | GO:0002042~cell migration involved in sprouting angiogenesis       | 2     | 3,80 | #####       |
| GOTERM_BP_DIRECT               |  | GO:0045776~negative regulation of blood pressure                   | 2     | 3,80 | #####       |
| <b>Ligandom_MHC_II (n=123)</b> |  | Term                                                               | Count | %    | PValue      |
| GOTERM_BP_DIRECT               |  | GO:0030154~cell differentiation                                    | 7     | 5,7  | 0.060052910 |
| GOTERM_BP_DIRECT               |  | GO:0035556~intracellular signal transduction                       | 6     | 4,9  | 0.095834061 |
| GOTERM_BP_DIRECT               |  | GO:0007268~chemical synaptic transmission                          | 5     | 4,1  | 0.056875200 |
| GOTERM_BP_DIRECT               |  | GO:0035690~cellular response to drug                               | 3     | 2,4  | 0.064804355 |
| GOTERM_BP_DIRECT               |  | GO:0001558~regulation of cell growth                               | 3     | 2,4  | 0.083710410 |
| GOTERM_BP_DIRECT               |  | GO:0006890~retrograde vesicle-mediated transport, Golgi to ER      | 3     | 2,4  | 0.087310380 |
| GOTERM_BP_DIRECT               |  | GO:0006919~activation of cysteine-type endopeptidase activity inv  | 3     | 2,4  | 0.089127662 |
| GOTERM_BP_DIRECT               |  | GO:0060355~positive regulation of cell adhesion molecule producti  | 2     | 1,6  | 0.023844990 |
| GOTERM_BP_DIRECT               |  | GO:0060294~cilium movement involved in cell motility               | 2     | 1,6  | 0.035555498 |
| GOTERM_BP_DIRECT               |  | GO:0046512~sphingosine biosynthetic process                        | 2     | 1,6  | 0.047126890 |
| GOTERM_BP_DIRECT               |  | GO:0045086~positive regulation of interleukin-2 biosynthetic proce | 2     | 1,6  | 0.069858878 |
| <b>Neoantigenic (n=357)</b>    |  | Term                                                               | Count | %    | PValue      |
| GOTERM_BP_DIRECT               |  | GO:0043547~positive regulation of GTPase activity                  | 21    | 5,9  | 0.003465011 |
| GOTERM_BP_DIRECT               |  | GO:0007155~cell adhesion                                           | 19    | 5,3  | 0.001841595 |
| GOTERM_BP_DIRECT               |  | GO:0006955~immune response                                         | 14    | 3,9  | 0.043239300 |
| GOTERM_BP_DIRECT               |  | GO:0035556~intracellular signal transduction                       | 13    | 3,6  | 0.063736696 |
| GOTERM_BP_DIRECT               |  | GO:0019882~antigen processing and presentation                     | 11    | 3,1  | 4,64E+08    |
| GOTERM_BP_DIRECT               |  | GO:0060333~interferon-gamma-mediated signaling pathway             | 11    | 3,1  | 5,68E+08    |
| GOTERM_BP_DIRECT               |  | GO:0007268~chemical synaptic transmission                          | 11    | 3,1  | 0.012299544 |
| GOTERM_BP_DIRECT               |  | GO:0007411~axon guidance                                           | 10    | 2,8  | 0.002472512 |
| GOTERM_BP_DIRECT               |  | GO:0098609~cell-cell adhesion                                      | 10    | 2,8  | 0.058731936 |
| GOTERM_BP_DIRECT               |  | GO:0016032~viral process                                           | 10    | 2,8  | 0.094343976 |
| GOTERM_BP_DIRECT               |  | GO:0019886~antigen processing and presentation of exogenous pe     | 9     | 2,5  | 2,62E+11    |
| GOTERM_BP_DIRECT               |  | GO:0006974~cellular response to DNA damage stimulus                | 9     | 2,5  | 0.035887767 |
| GOTERM_BP_DIRECT               |  | GO:0030198~extracellular matrix organization                       | 8     | 2,2  | 0.066012168 |
| GOTERM_BP_DIRECT               |  | GO:0034220~ion transmembrane transport                             | 8     | 2,2  | 0.087526195 |
| GOTERM_BP_DIRECT               |  | GO:0002504~antigen processing and presentation of peptide or pol   | 7     | 2,0  | 3,51E+08    |

**supplementary Table 5: Results of the DAVID 6.8 database search regarding cellular compartment (CC)**

| <b>Ligandom_MHC_I (n=53)</b>   | Term                                                  | Count | %    | PValue     | Genes       |
|--------------------------------|-------------------------------------------------------|-------|------|------------|-------------|
| GOTERM_CC_DIRECT               | GO:0005737~cytoplasm                                  | 35,8  | 19,0 | 0.04356707 | A8K3F7_HUM  |
| <b>Ligandom_MHC_II (n=123)</b> | Term                                                  | Count | %    | PValue     | Genes       |
| GOTERM_CC_DIRECT               | GO:0005886~plasma membrane                            | 27,6  | 34,0 | 0.06844827 | Q86XB2_HUM  |
| GOTERM_CC_DIRECT               | GO:0005576~extracellular region                       | 13,0  | 16,0 | 0.07690256 | F8VXR5_HUM  |
| GOTERM_CC_DIRECT               | GO:0030054~cell junction                              | 7,3   | 9,0  | 0.00821206 | D6RDX5_HUM  |
| GOTERM_CC_DIRECT               | GO:0043231~intracellular membrane-bounded organelle   | 6,5   | 8,0  | 0.06098284 | C9J6M1_HUM  |
| GOTERM_CC_DIRECT               | GO:0000151~ubiquitin ligase complex                   | 4,1   | 5,0  | 0.00472469 | A0A087X0C6  |
| GOTERM_CC_DIRECT               | GO:0030666~endocytic vesicle membrane                 | 2,4   | 3,0  | 0.06423374 | D6RFM6_HUM  |
| GOTERM_CC_DIRECT               | GO:0030141~secretory granule                          | 2,4   | 3,0  | 0.07835515 | H0Y332_HUM  |
| <b>Neoantigenic (n=357)</b>    | Term                                                  | Count | %    | PValue     | Genes       |
| GOTERM_CC_DIRECT               | GO:0016021~integral component of membrane             | 32,20 | 115  | 0.00839777 | 253914956   |
| GOTERM_CC_DIRECT               | GO:0005886~plasma membrane                            | 27,70 | 99   | 0.00173449 | 15629141945 |
| GOTERM_CC_DIRECT               | GO:0016020~membrane                                   | 17,60 | 63   | 2,71E+11   |             |
| GOTERM_CC_DIRECT               | GO:0005887~integral component of plasma membrane      | 9,50  | 34   | 0.08228878 | 737164072   |
| GOTERM_CC_DIRECT               | GO:0009986~cell surface                               | 7,30  | 26   | 2,08E+11   |             |
| GOTERM_CC_DIRECT               | GO:0000139~Golgi membrane                             | 5,30  | 19   | 0.02369699 | 3647115815  |
| GOTERM_CC_DIRECT               | GO:0005765~lysosomal membrane                         | 4,20  | 15   | 5,12E+11   |             |
| GOTERM_CC_DIRECT               | GO:0030054~cell junction                              | 3,90  | 14   | 0.07682308 | 487897786   |
| GOTERM_CC_DIRECT               | GO:0005913~cell-cell adherens junction                | 3,40  | 12   | 0.03509148 | 222155779   |
| GOTERM_CC_DIRECT               | GO:0016324~apical plasma membrane                     | 2,80  | 10   | 0.08628603 | 86666289    |
| GOTERM_CC_DIRECT               | GO:0042613~MHC class II protein complex               | 2,50  | 9    | 2,79E+07   |             |
| GOTERM_CC_DIRECT               | GO:0071556~integral component of lumenal side of endo | 2,50  | 9    | 3,35E+08   |             |
| GOTERM_CC_DIRECT               | GO:0012507~ER to Golgi transport vesicle membrane     | 2,50  | 9    | 4,08E+09   |             |
| GOTERM_CC_DIRECT               | GO:0030018~Z disc                                     | 2,20  | 8    | 0.00578947 | 670451794   |
| GOTERM_CC_DIRECT               | GO:0010008~endosome membrane                          | 2,20  | 8    | 0.05241370 | 4564529595  |
| GOTERM_CC_DIRECT               | GO:0030666~endocytic vesicle membrane                 | 2,00  | 7    | 0.00124751 | 35934179747 |
| GOTERM_CC_DIRECT               | GO:0030658~transport vesicle membrane                 | 1,70  | 6    | 5,88E+10   |             |
| GOTERM_CC_DIRECT               | GO:0030669~clathrin-coated endocytic vesicle membran  | 1,70  | 6    | 8,40E+11   |             |
| GOTERM_CC_DIRECT               | GO:0032588~trans-Golgi network membrane               | 1,70  | 6    | 0.01759229 | 32861812    |
| GOTERM_CC_DIRECT               | GO:0001726~ruffle                                     | 1,70  | 6    | 0.02406304 | 288415928   |
| GOTERM_CC_DIRECT               | GO:0012505~endomembrane system                        | 1,70  | 6    | 0.05695437 | 2031701735  |

**supplementary Table 5:** Results of the DAVID 6.8 database search regarding molecular function (MF)**Ligandom\_MHC\_I (n=53)** none found

| <b>Ligandom_MHC_II (n=123)</b> | Term                                          | Count | % | PValue | Genes                    | List Total | Pop Hits | Pop Total | Fold Enrichme | Bonferroni   | Benjamini    | FDR |
|--------------------------------|-----------------------------------------------|-------|---|--------|--------------------------|------------|----------|-----------|---------------|--------------|--------------|-----|
| GOTERM_MF_DIRECT               | GO:0005515~protein binding                    | 62    |   | 50,4   | 0.0858491094 K7ELE0_HUMA | 104        | 8785     | 16881     | 1,1           | 0.9999999928 | 0.9765281314 | 6,8 |
| GOTERM_MF_DIRECT               | GO:0016874~ligase activity                    | 7     |   | 5,7    | 0.0062164289 C9J6M1_HUMA | 104        | 270      | 16881     | 4,2           | 0.7283630264 | 0.4788119594 | 7,6 |
| GOTERM_MF_DIRECT               | GO:0016787~hydrolase activity                 | 5     |   | 4,1    | 0.0295323728 Q6PJ10_HUMA | 104        | 191      | 16881     | 4,2           | 0.9980987464 | 0.8761165345 | 3,2 |
| GOTERM_MF_DIRECT               | GO:0005520~insulin-like growth factor binding | 3     |   | 2,4    | 0.0052927192 NOV_HUMAN,  | 104        | 18       | 16881     | 27,1          | 0.6701495953 | 0.6701495953 | 6,5 |
| GOTERM_MF_DIRECT               | GO:0003777~microtubule motor activity         | 3     |   | 2,4    | 0.0857825048 H7C506_HUMA | 104        | 80       | 16881     | 6,1           | 0.9999999927 | 0.990777298  | 6,8 |

| <b>Neoantigenic (n=357)</b> | Term                                            | Count | % | PValue | Genes                 | List Total | Pop Hits | Pop Total | Fold Enrichme | Bonferroni   | Benjamini    | FDR    |
|-----------------------------|-------------------------------------------------|-------|---|--------|-----------------------|------------|----------|-----------|---------------|--------------|--------------|--------|
| GOTERM_MF_DIRECT            | GO:0005524~ATP binding                          | 39    |   | 10,90  | 0.022897646311181793  | 309        | 1495     | 16881     | 1,40          | 0.9999985705 | 0.8140497288 | 29,0   |
| GOTERM_MF_DIRECT            | GO:0005509~calcium ion binding                  | 22    |   | 6,20   | 0.022704774934432643  | 309        | 717      | 16881     | 1,70          | 0.9999983968 | 0.8513587050 | 29,0   |
| GOTERM_MF_DIRECT            | GO:0004674~protein serine/threonine kinase act  | 13    |   | 3,60   | 0.043937162117497576  | 309        | 376      | 16881     | 1,90          | 0.9999999999 | 0.9068186262 | 48,0   |
| GOTERM_MF_DIRECT            | GO:0098641~cadherin binding involved in cell-ce | 11    |   | 3,10   | 0.040700453795372515  | 309        | 290      | 16881     | 2,10          | 0.9999999999 | 0.9105580441 | 46,0   |
| GOTERM_MF_DIRECT            | GO:0042605~peptide antigen binding              | 8     |   | 2,20   | 5,36E+08              |            |          |           | 15,60         |              |              | 0,0008 |
| GOTERM_MF_DIRECT            | GO:0016887~ATPase activity                      | 8     |   | 2,20   | 0.05099901372151747   | 309        | 183      | 16881     | 2,40          | 0.9999999999 | 0.9206900565 | 54,0   |
| GOTERM_MF_DIRECT            | GO:0005215~transporter activity                 | 8     |   | 2,20   | 0.07746897997553727   | 309        | 202      | 16881     | 2,20          | 1.0          | 0.9464977835 | 69,0   |
| GOTERM_MF_DIRECT            | GO:0001618~virus receptor activity              | 7     |   | 2,00   | 0.0017299458733675617 |            |          |           | 5,50          |              |              | 2,5    |
| GOTERM_MF_DIRECT            | GO:0051015~actin filament binding               | 7     |   | 2,00   | 0.034132045112144724  | 309        | 132      | 16881     | 2,90          | 0.9999999982 | 0.8937430231 | 40,0   |
| GOTERM_MF_DIRECT            | GO:0032395~MHC class II receptor activity       | 6     |   | 1,70   | 5,06E+09              |            |          |           | 21,90         |              |              | 0,0074 |
| GOTERM_MF_DIRECT            | GO:0005085~guanyl-nucleotide exchange factor    | 6     |   | 1,70   | 0.06506405173825588   | 309        | 118      | 16881     | 2,80          | 1.0          | 0.9261613081 | 63,0   |
| GOTERM_MF_DIRECT            | GO:0003777~microtubule motor activity           | 5     |   | 1,40   | 0.058526832974908995  | 309        | 80       | 16881     | 3,40          | 0.9999999999 | 0.9181479073 | 59,0   |
| GOTERM_MF_DIRECT            | GO:0043621~protein self-association             | 4     |   | 1,10   | 0.05136113493993911   | 309        | 46       | 16881     | 4,80          | 0.9999999999 | 0.9052483074 | 54,0   |
| GOTERM_MF_DIRECT            | GO:0005518~collagen binding                     | 4     |   | 1,10   | 0.09650906435900997   | 309        | 60       | 16881     | 3,60          | 1.0          | 0.9688375897 | 78,0   |
| GOTERM_MF_DIRECT            | GO:0046977~TAP binding                          | 3     |   | 0,80   | 9,83E+11              |            |          |           | 54,60         |              |              | 1,4    |
| GOTERM_MF_DIRECT            | GO:0030881~beta-2-microglobulin binding         | 3     |   | 0,80   | 0.01636964075781915   |            |          |           | 14,90         |              |              | 22,0   |
| GOTERM_MF_DIRECT            | GO:0050321~tau-protein kinase activity          | 3     |   | 0,80   | 0.01940936334341533   | 309        | 12       | 16881     | 13,70         | 0.9999886661 | 0.8501248320 | 25,0   |

| <b>Cryptic (n=67)</b> | Term                                           | Count | % | PValue | Genes                | List Total | Pop Hits | Pop Total | Fold Enrichme | Bonferroni   | Benjamini    | FDR  |
|-----------------------|------------------------------------------------|-------|---|--------|----------------------|------------|----------|-----------|---------------|--------------|--------------|------|
| GOTERM_MF_DIRECT      | GO:0005524~ATP binding                         | 12    |   | 17,90  | 0.011870463182022332 | 59         | 1495     | 16881     | 2,30          | 0.8143233643 | 0.4295042420 | 13,0 |
| GOTERM_MF_DIRECT      | GO:0046872~metal ion binding                   | 12    |   | 17,90  | 0.09191027432081117  | 59         | 2069     | 16881     | 1,70          | 0.9999987521 | 0.8565853112 | 68,0 |
| GOTERM_MF_DIRECT      | GO:0004672~protein kinase activity             | 6     |   | 9,00   | 0.007708616142669461 | 59         | 359      | 16881     | 4,80          | 0.6641618176 | 0.6641618176 | 8,7  |
| GOTERM_MF_DIRECT      | GO:0004713~protein tyrosine kinase activity    | 4     |   | 6,00   | 0.010760876199650679 | 59         | 133      | 16881     | 8,60          | 0.7824890825 | 0.5336193432 | 12,0 |
| GOTERM_MF_DIRECT      | GO:0005088~Ras guanyl-nucleotide exchange fa   | 3     |   | 4,50   | 0.05941500830964671  | 59         | 115      | 16881     | 7,50          | 0.9998225302 | 0.7629423086 | 52,0 |
| GOTERM_MF_DIRECT      | GO:0004716~receptor signaling protein tyrosine | 2     |   | 3,00   | 0.033840657720354064 | 59         | 10       | 16881     | 57,20         | 0.9922039461 | 0.7028548083 | 33,0 |
| GOTERM_MF_DIRECT      | GO:0016805~dipeptidase activity                | 2     |   | 3,00   | 0.04377156529840589  | 59         | 13       | 16881     | 44,00         | 0.9981836760 | 0.7169659805 | 41,0 |
